# Supplementary material for: Acetylcholinesterase inhibition-based colorimetric determination of Hg2+ using unmodified silver nanoparticles
Source: Royal Society of Chemistry journal article supplement (doi:10.1039/c4nj01722f), 2014-12-01
Supplement: c4nj01722f1.pdf [file c4nj01722f1.pdf]

1 **Acetylcholinesterase inhibition-based colorimetric determination of Hg<sup>2+</sup> using**  
2 **unmodified silver nanoparticles**

3

4 Dashananda Nanda Kumar, Ayyachamy Rajeshwari, Sruthi Ann Alex,  
5 Natarajan Chandrasekaran, Amitava Mukherjee \*

6

7 Centre for Nanobiotechnology, VIT University, Vellore, India

8 **Supplementary Information**

9

10

11

12

13 **\*Corresponding author**

14 **Dr. Amitava Mukherjee**

15 **Senior Professor & Deputy Director**

16 **Centre for Nanobiotechnology**

17 **VIT University, Vellore - 632014**

18 **Email: [amit.mookerjea@gmail.com](mailto:amit.mookerjea@gmail.com)**

19 **Phone: 91 416 2202620**

20 **Fax: 91-416-2243092**

21

22

23

24 **Figure S1** Hydrodynamic distribution for (A) AgNPs and water, (b) AgNPs and AChE (400 mU  
 25 mL<sup>-1</sup>), (c) AgNPs and Hg<sup>2+</sup> (1 nM) in presence of AChE (400 mU mL<sup>-1</sup>), (d) AgNPs and Hg<sup>2+</sup> (1  
 26 nM), (e) AgNPs and Hg<sup>2+</sup> (1 nM) in presence of ATCh (80 μM), after addition of AChE (400 mU  
 27 mL<sup>-1</sup>).

28

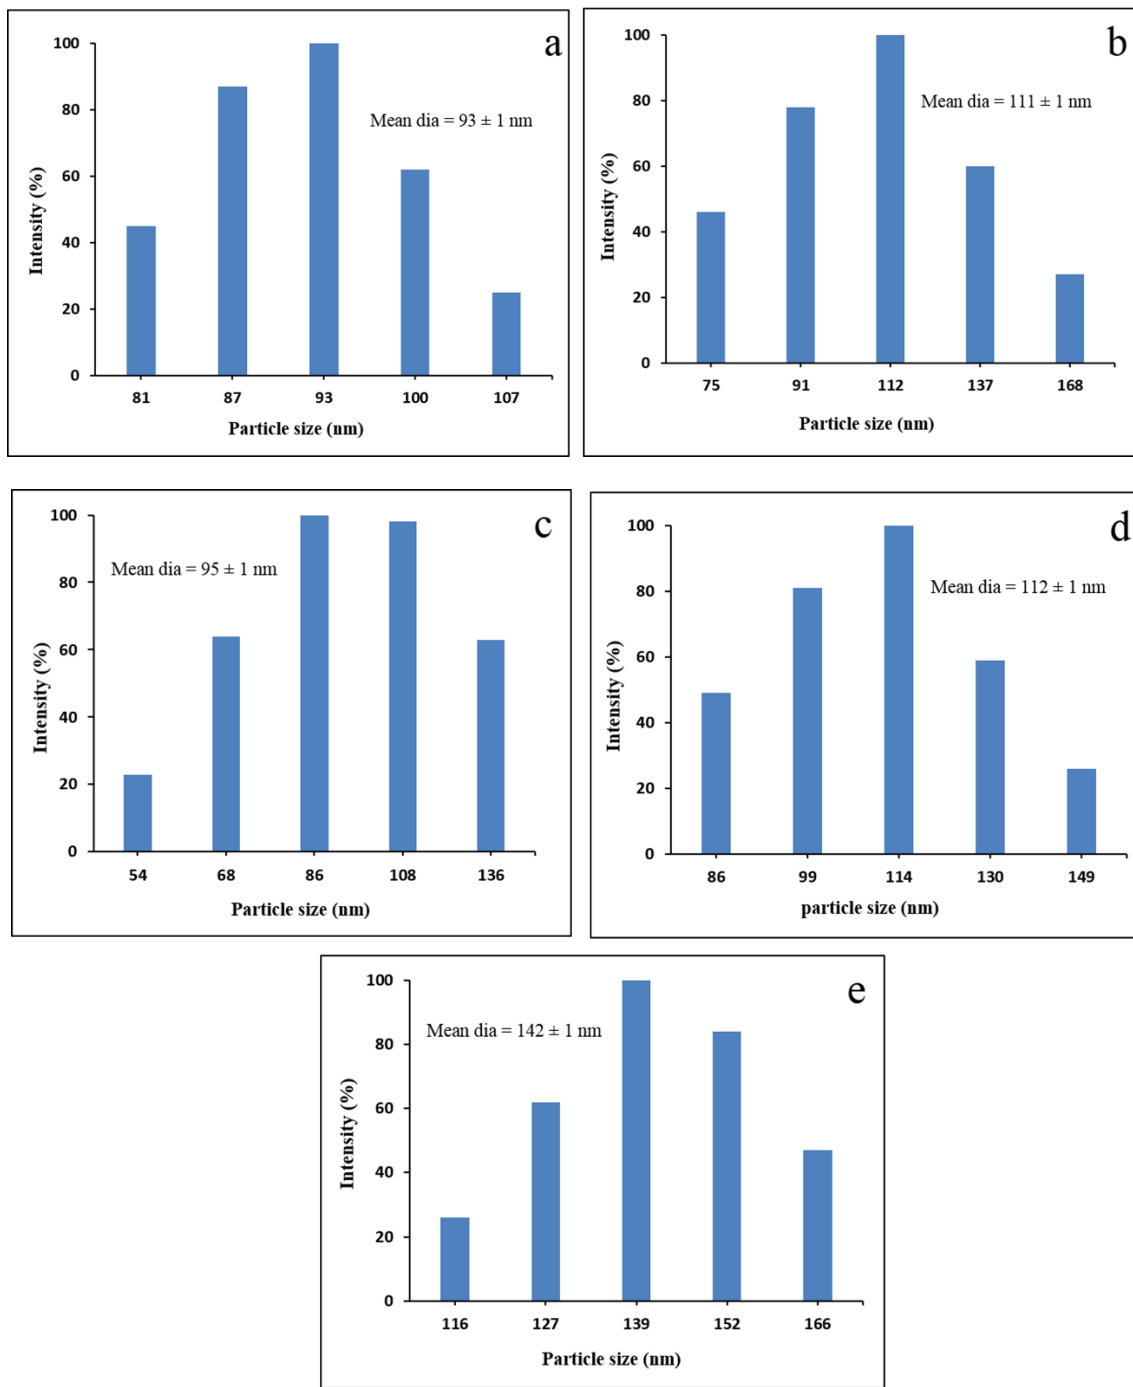

32 **Figure S2** UV-visible spectra for AgNPs after addition of ATCh (80  $\mu$ M) and AChE (400 mU  
33 mL<sup>-1</sup>) recorded for every 1 min.

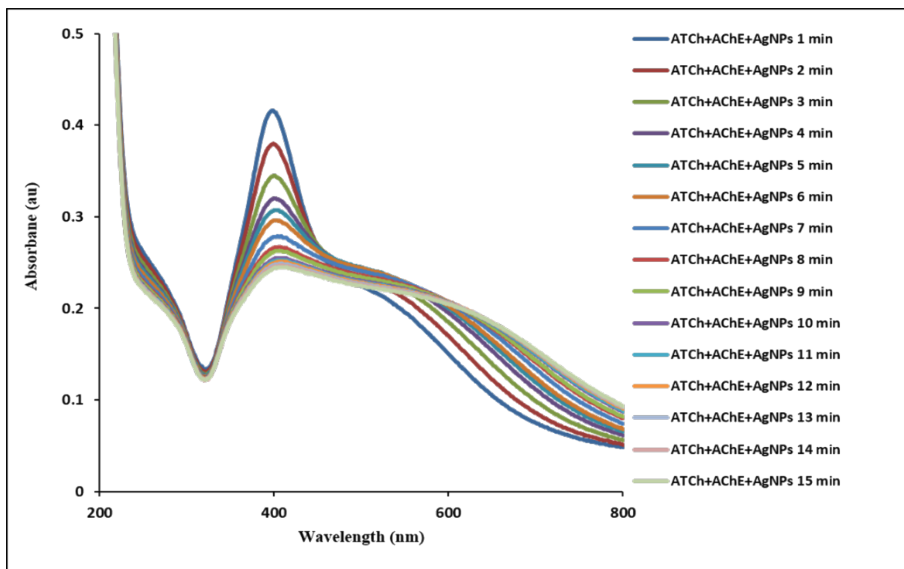

34  
35  
36  
37  
38  
39  
40  
41  
42  
43  
44  
45  
46  
47  
48  
49

50 **Figure S3** (a) UV-visible spectra for AgNPs in the presence of different concentrations of ATCh  
51 (40-150  $\mu\text{M}$ ) and AChE (400  $\text{mU mL}^{-1}$ ) and (b) ATCh (80  $\mu\text{M}$ ); all the samples were allowed to  
52 incubate for 5 min at 37  $^{\circ}\text{C}$ .

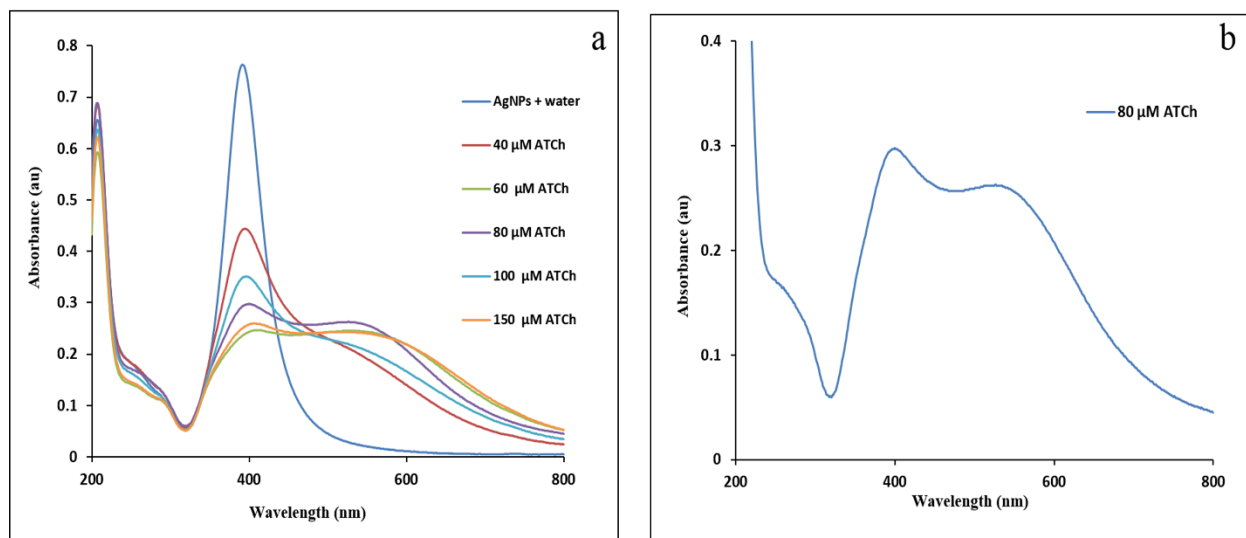

53  
54  
55  
56  
57  
58  
59  
60  
61  
62  
63  
64  
65  
66  
67

68 **Figure S4** UV-visible spectra for AgNPs in the presence of different concentrations of AChE  
69 (0-400 mU mL<sup>-1</sup>) and ATCh (80 μM); and the samples were incubated for 5 min at 37 °C.

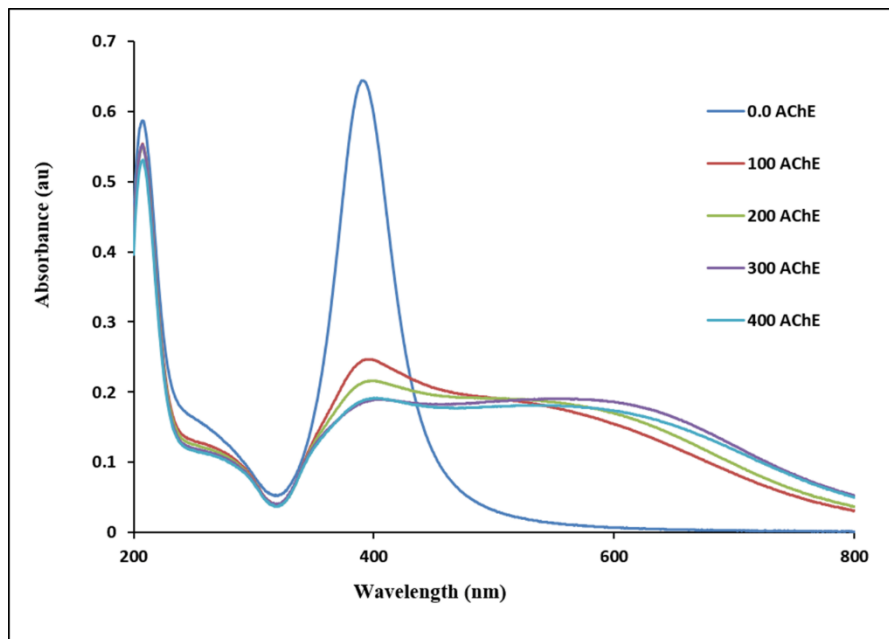

70  
71  
72  
73  
74  
75  
76  
77  
78  
79  
80  
81  
82  
83  
84  
85  
86

87 **Figure S5** UV-visible spectra for AgNPs in the presence of (a) lake water (b) ground water and  
88 (c) sea water

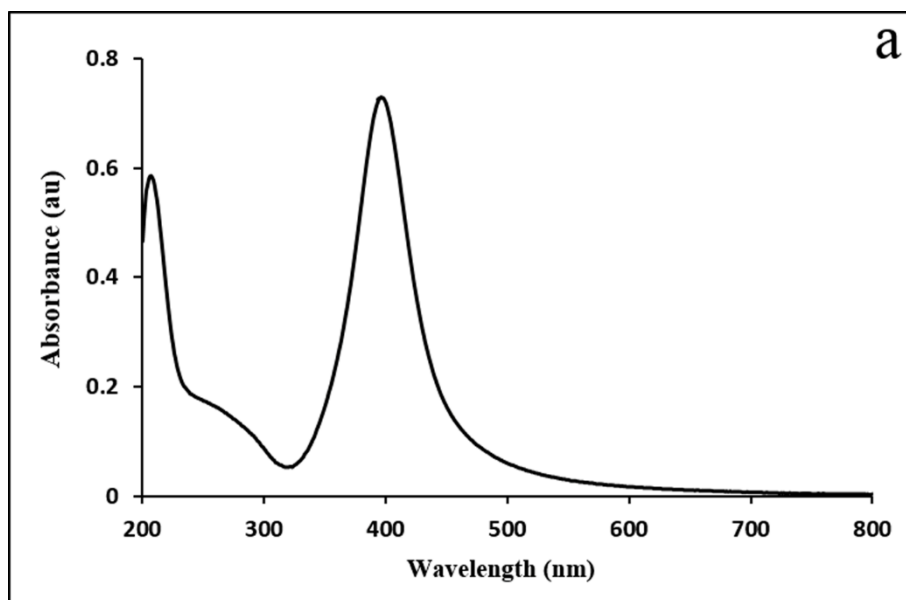

89  
90

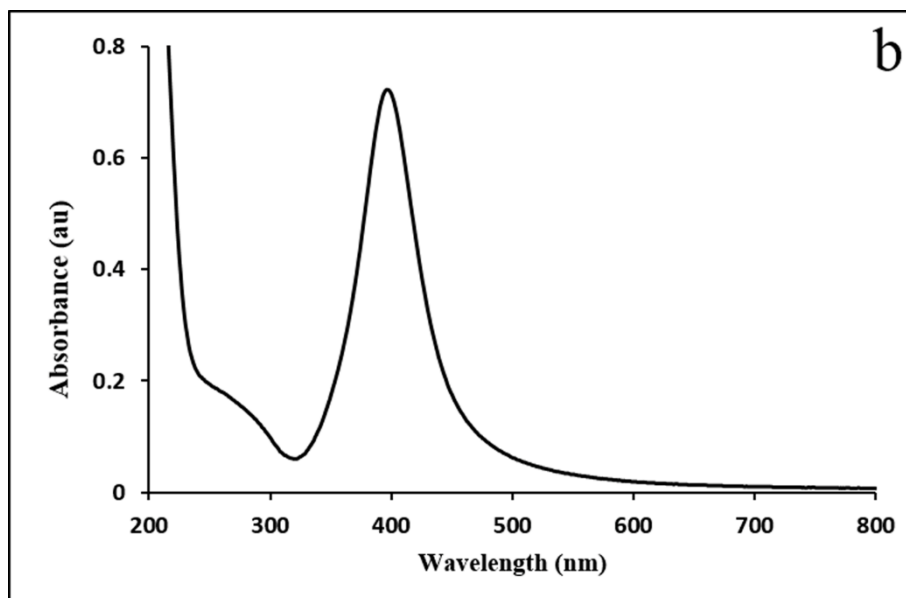

91  
92

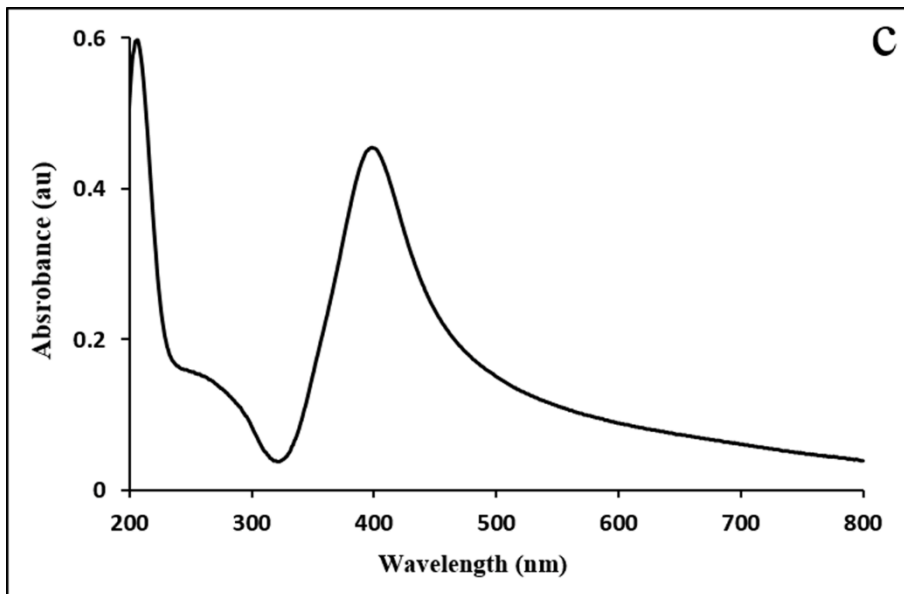

93

94
